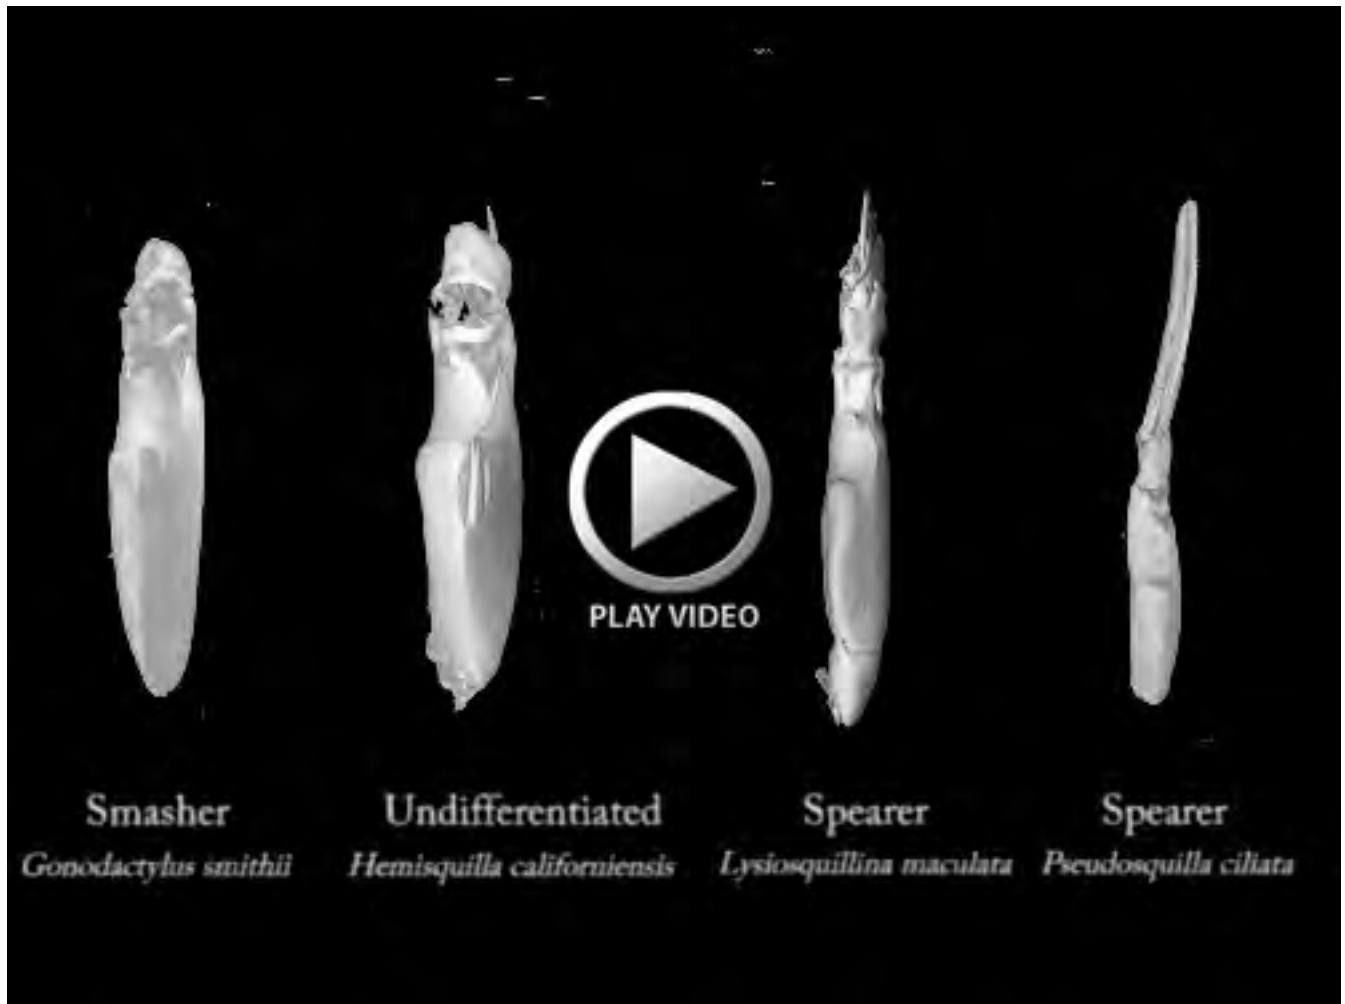

**Movie 1.** Rotating stomatopod raptorial appendages. Rendered CT scans show the external morphology of four stomatopod raptorial appendages. The appendages are rotating along the distal–proximal axis, with distal toward the top of the page. The four species are scaled to appear as similar sizes, although their actual sizes span a wide range (Fig. 2).
